# Supplementary material for: Basophilic green fluorescent carbon nanoparticles derived from benzoxazine for the detection of Cr(vi) in a strongly alkaline environment
Source: Royal Society of Chemistry journal article supplement (doi:10.1039/c7ra10814a), 2018-01-01
Supplement: c7ra10814a1.pdf [file c7ra10814a1.pdf]

Electronic Supplementary Information

**Basophilic green fluorescent carbon nanoparticles derived from benzoxazine for the detection of Cr(VI) in a strong alkaline environment**

Bin Fang,<sup>a</sup> Ping Wang,<sup>a</sup> Yujia Zhu,<sup>b</sup> Caoyu Wang,<sup>a</sup> Geng Zhang,<sup>a</sup> Xincheng Zheng,<sup>a</sup>  
Cong Ding,<sup>a</sup> Jiangjiang Gu<sup>\*a</sup> and Feifei Cao<sup>\*a</sup>

<sup>a</sup> College of Science, Huazhong Agricultural University, Wuhan 430070, P. R. China.

<sup>b</sup> Departments of Radiation Oncology, State Key Laboratory of Oncology in South China, Collaborative Innovation Center for Cancer Medicine, Sun Yat-sen University Cancer Center, Guangzhou, 510060, P. R. China

**Table S1.** Elemental analysis result of the G-CNPs.

| Sample | C (%) | H (%) | N (%) |
|--------|-------|-------|-------|
| G-CNPs | 54.78 | 4.48  | 1.04  |

**Table S2.** Comparison of different CNPs and CDs for Cr(VI) detection.

| Material             | pH value   | Linear range<br>( $\mu\text{M}$ ) | Limit of<br>detection ( $\mu\text{M}$ ) | Reference |
|----------------------|------------|-----------------------------------|-----------------------------------------|-----------|
| N, S co-doped CDs    | 3, 7.4, 12 | 1-80                              | 0.86                                    | [S1]      |
| N, S-co-doped CDs    | 3          | 1-40                              | 0.52                                    | [S2]      |
| CDs                  | 5          | 2-180                             | 2.10                                    | [S3]      |
| Cobalt(II)-doped CDs | —          | 5-125                             | 1.17                                    | [S4]      |
| NB-CQDs              | 8.0        | 0-250                             | 0.5                                     | [S5]      |
| N,S-CDs              | 2          | 1-200                             | 0.76                                    | [S6]      |
| G-CNPs               | 14         | 1-300                             | 0.58                                    | This work |

**Table S3.** G-CNPs for the Cr(VI) detection in water samples.

| Sample     | Added Cr(VI) ( $\mu\text{M}$ ) | Found Cr(VI) ( $\mu\text{M}$ ) | Recovery (%) | RSD (%) |
|------------|--------------------------------|--------------------------------|--------------|---------|
| Tap water  | 0                              | Not detected                   | -            | -       |
|            | 10                             | 10.23                          | 102.3        | 1.31    |
|            | 100                            | 105.03                         | 105.0        | 2.24    |
| Lake water | 0                              | Not detected                   | -            | -       |
|            | 10                             | 10.10                          | 101.0        | 1.20    |
|            | 100                            | 99.90                          | 99.9         | 0.71    |

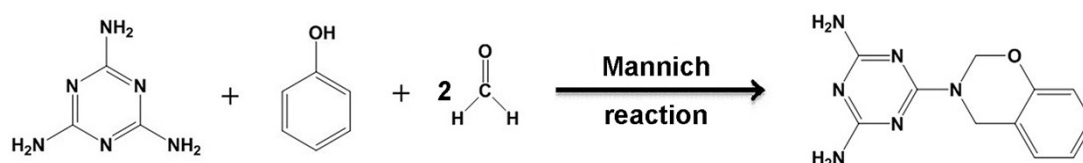

**Fig. S1.** The synthetic procedure of BZ.

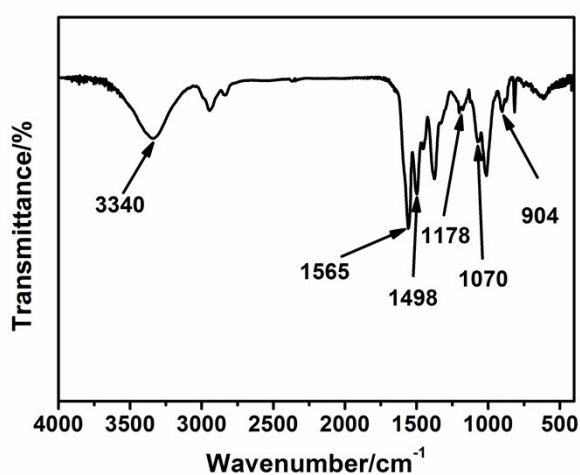

**Fig. S2.** FT-IR spectrum of BZ.

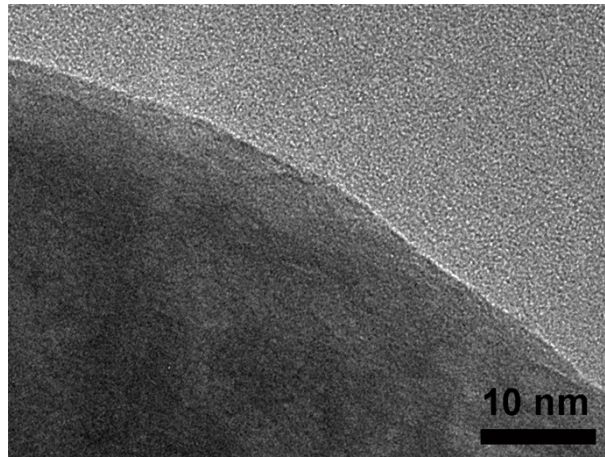

**Fig. S3.** HRTEM image of an individual G-CNP.

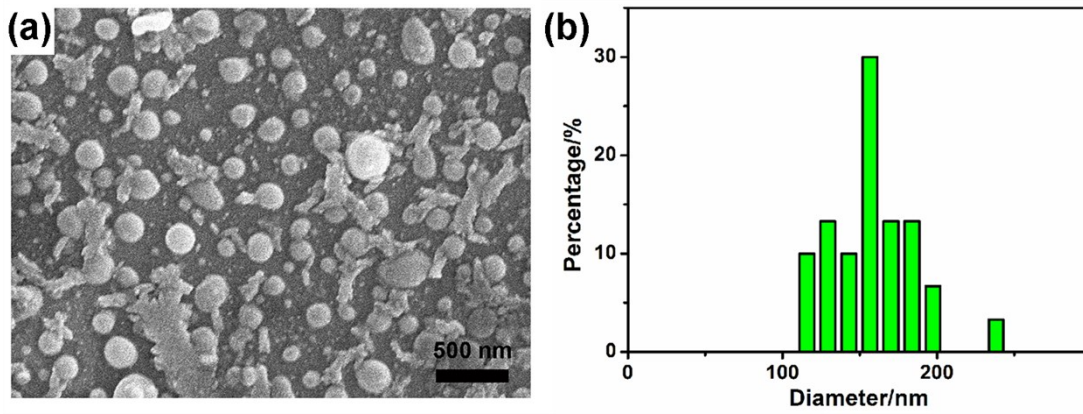

**Fig. S4.** SEM image (a) and the corresponding particle size distribution histogram (b) of G-CNPs.

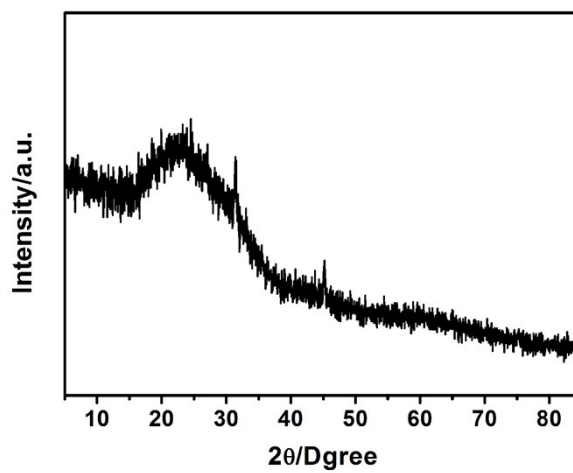

**Fig. S5.** XRD pattern of G-CNPs.

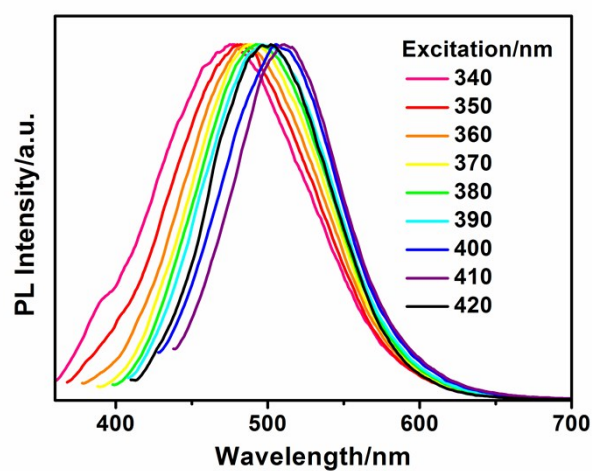

**Fig. S6.** Normalized PL spectra of G-CNPs at different excitation wavelengths.

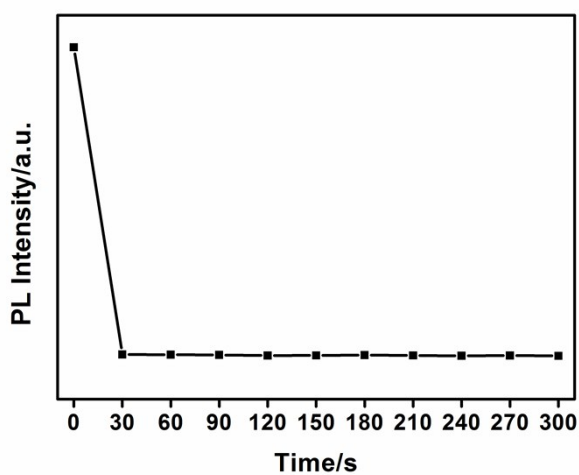

**Fig. S7.** Time-dependent PL intensity of G-CNPs with Cr (VI) in NaOH (pH=14).

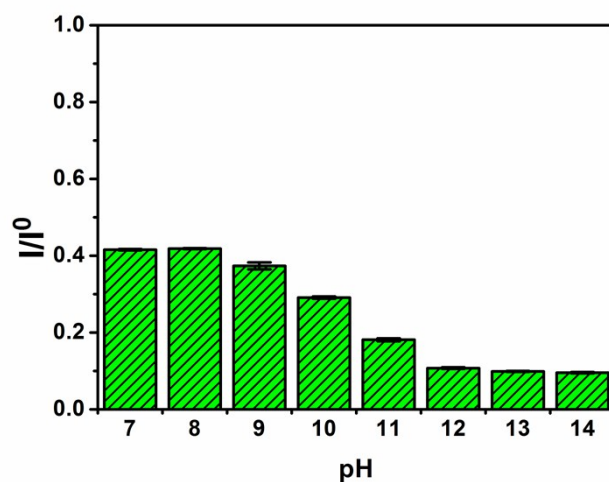

**Fig. S8.** pH effect on G-CNPs for the detection of Cr (VI). I and I<sup>0</sup> were the PL

intensities (495nm) of G-CNPs at 380 nm excitation in the presence and absence of 200  $\mu$ M Cr(VI), respectively.

## References

S1 J. Chen, J. Liu, J. Li, L. Xu and Y. Qiao, *J. Colloid Interf. Sci.*, 2017, **485**, 167–174.

S2 J. Shen, S. Shang, X. Chen, D. Wang and Y. Cai, *Sens. Actuators B: Chem.*, 2017, **248**, 92–100.

S3 C. Li, W. Liu, X. Sun, W. Pan and J. Wang, *Sens. Actuators B: Chem.*, 2017, **252**, 544–553.

S4 H.-Y. Zhang, Y. Wang, S. Xiao, H. Wang, J.-H. Wang and L. Feng, *Biosens. Bioelectron.*, 2017, **87**, 46–52.

S5 Y. Guo, Y. Chen, F. Cao, L. Wang, Z. Wang and Y. Leng, *RSC Adv.*, 2017, **7**, 48386–48393.

S6 J. Shen, T. Zhang, Y. Cai, X. Chen, S. Shang and J. Li, *New J. Chem.*, 2017, **41**, 11125—11137.
